# Supplementary material for: Electronic delocalization engineering of bismuth-based materials for catalytic electrochemical CO2and N2conversion
Source: Royal Society of Chemistry journal article supplement (doi:10.1039/d4ta02863e), 2024-01-01
Supplement: d4ta02863e1.pdf [file d4ta02863e1.pdf]

## Supporting information

### Electronic delocalization engineering of bismuth-based materials for catalytic electrochemical CO<sub>2</sub> and N<sub>2</sub> Conversion

Ming Peng,<sup>1,2</sup> Junfeng Zhang,<sup>1</sup> Jianwei Ren,<sup>3</sup> Yongwen Tan<sup>1,\*</sup>

**Table S1** Typical performance parameters of Bi-based materials for CO<sub>2</sub>RR

| Material                                   | Preparation method             | Partial current density                             | Stability (h)                                             | HCOOH production rate                                                   | FE                                            | Energy efficiency       | Reference |
|--------------------------------------------|--------------------------------|-----------------------------------------------------|-----------------------------------------------------------|-------------------------------------------------------------------------|-----------------------------------------------|-------------------------|-----------|
| single-crystalline Bi rhombic dodecahedron | solvent thermal reduction      | 290.1 mA cm <sup>-2</sup> @-0.78V vs RHE            | 20 h @ at -0.68 V vs RHE in 1.0 M KOH                     | 2.88 mmol cm <sup>-2</sup> h <sup>-1</sup>                              | > 92.2% from 9.8 to 290.1 mA cm <sup>-2</sup> | 69.5%                   | 70        |
| angular-shaped Bi microparticles           | electrodeposition              | 271.7 mA cm <sup>-2</sup> @-1.1 V vs RHE in 1 M KOH | 10 h@-1.1 V vs RHE                                        | 5.0688 mmol cm <sup>-2</sup> h <sup>-1</sup> @-1.1 V vs RHE             | > 95% from -0.6 to -1.1 V vs RHE              | 76.4% @-0.6 V vs RHE    | 129       |
| Cu-doped Bi                                | electrochemical reconstruction | -1.1 A cm <sup>-2</sup> (Total) at -0.86 V vs RHE   | 100 h at -400 mA cm <sup>-2</sup>                         | 21.0 mmol h <sup>-1</sup> cm <sup>-2</sup> at -0.86 V vs RHE in 1 M KOH | > 96%                                         | /                       | 137       |
| nanoporous Sb-Bi alloys                    | dealloying                     | 734 mA cm <sup>-2</sup> at -1.0 V vs RHE in 1 M KOH | 12 h @ -0.8 V vs RHE in 0.5 M KHCO <sub>3</sub>           | 13.6 mmol h <sup>-1</sup> cm <sup>-2</sup> at -1.0 V vs RHE             | 95.8 % at -0.9 V vs RHE                       | 64.8 % at -0.8 V vs RHE | 139       |
| Bi/CeOx                                    | electrochemical reduction      | 137 mA cm <sup>-2</sup> at -1.3 V vs RHE            | 34 h @ at -1.2 V in 0.2 M Na <sub>2</sub> SO <sub>4</sub> | 2600 μmol h <sup>-1</sup> cm <sup>-2</sup> at -1.3 V vs RHE             | 98 % at -1.2 V                                | /                       | 146       |

|                                                          |                                   |                                                                     |                                                     |                                                                        |                                    |                           |     |
|----------------------------------------------------------|-----------------------------------|---------------------------------------------------------------------|-----------------------------------------------------|------------------------------------------------------------------------|------------------------------------|---------------------------|-----|
| Bi nanoribbons/Bi-O edge sites                           | H <sub>2</sub> thermal reduction  | 46.4 mA/cm <sup>2</sup> at -1.2 V vs RHE in 0.5 M KHCO <sub>3</sub> | > 100 h in 0.5 M KHCO <sub>3</sub>                  | /                                                                      | > 95% in wide range                | /                         | 151 |
| Sn-doped Bi/BiOx                                         | dealloying                        | ~100 mA cm <sup>-2</sup> at -0.7 V vs RHE                           | 20 h @ at -0.7 V vs RHE in 1.0 M KOH                | /                                                                      | > 92% in wide range                | /                         | 154 |
| Bi <sub>2</sub> O <sub>2</sub> CO <sub>3</sub> nanosheet | electrically driven conversion    | 930 mA cm <sup>-2</sup> at -1.55 V vs RHE                           | 12 h @ at -0.9 V vs RHE in 0.5 M KHCO <sub>3</sub>  | /                                                                      | 93% at -1.55 V vs RHE              | /                         | 161 |
| Bi nanodendrites                                         | galvanic-cell deposition          | ~180 mA cm <sup>-2</sup> at -1.25 V vs RHE                          | 80 h @ at -0.88 V vs RHE in 0.5 M KHCO <sub>3</sub> | 3.4 mmol h <sup>-1</sup> cm <sup>-2</sup> at -1.25 V vs RHE in 1 M KOH | 96.7% at -0.92 V vs RHE in 1 M KOH | /                         | 165 |
| V-Bi single atom alloy                                   | in situ electrochemical reduction | 77.7 mA cm <sup>-2</sup> at -1.3 V vs RHE                           | 90 h @ at -0.88 V vs RHE in 1 M KHCO <sub>3</sub>   | /                                                                      | 96.2% at -0.9 V vs RHE in 1 M KOH  | /                         | 172 |
| Bi nanosheets                                            | electrochemical reconstruction    | ~308 mA cm <sup>-2</sup> at -1.4 V vs RHE                           | 110 h @200 mA cm <sup>-2</sup>                      | /                                                                      | > 95% @-0.98 V vs RHE in 1 M KOH   | /                         | 183 |
| O-Bi-ene                                                 | electrochemical transformation    | /                                                                   | 12 h @-0.9 V vs RHE in 0.5 M KHCO <sub>3</sub>      | /                                                                      | > 90% @ -0.8 ~ -1.1 V vs RHE       | 64.9% at 1.9 V in 1 M KOH | 188 |

**Table S2** Typical performance parameters of Bi-based materials for N<sub>2</sub>RR

| Material                                                                        | Preparation method                     | NH <sub>3</sub> production rate                                                                                     | FE                                                                               | Reference |
|---------------------------------------------------------------------------------|----------------------------------------|---------------------------------------------------------------------------------------------------------------------|----------------------------------------------------------------------------------|-----------|
| 2D mosaic bismuth nanosheets                                                    | electrochemical reduction              | $2.54 \pm 0.16 \mu\text{g cm}^{-2} \text{ h}^{-1}$ ( $\sim 13.23 \mu\text{g mg}_{\text{cat}}^{-1} \text{ h}^{-1}$ ) | $10.46 \pm 1.45\%$ at $-0.8 \text{ V}$ vs RHE in $0.1 \text{ M Na}_2\text{SO}_4$ | 88        |
| Bi nanodendrites                                                                | electrodeposition                      | $25.86 \mu\text{g h}^{-1} \text{ mg}_{\text{cat}}^{-1}$ at $-0.60 \text{ V}$ vs RHE                                 | $10.8\%$ at $-0.55 \text{ V}$ vs RHE in $0.1 \text{ M HCl}$                      | 192       |
| Bi hollow nanospheres                                                           | one-pot solvothermal method            | $23.4 \pm 1.3 \mu\text{g h}^{-1} \text{ mg}_{\text{cat}}^{-1}$                                                      | $19.8 \pm 1.1\%$ at $-0.4 \text{ V}$ vs RHE in $0.1 \text{ M Na}_2\text{SO}_4$   | 193       |
| bismuth particle                                                                | polyol reduction method                | $404.9 \mu\text{g h}^{-1} \text{ mg}_{\text{cat}}^{-1}$                                                             | $62.37\%$ at $-0.50 \text{ V}$ vs RHE in $0.5 \text{ M K}_2\text{SO}_4$          | 194       |
| amorphous BiNi alloy                                                            | reduction method                       | $17.5 \mu\text{g h}^{-1} \text{ mg}_{\text{cat}}^{-1}$                                                              | $13.8\%$ at $-0.6 \text{ V}$ vs RHE in $0.1 \text{ M Na}_2\text{SO}_4$           | 197       |
| nanoporous Pd <sub>3</sub> Bi                                                   | electrochemical dealloying             | $59 \mu\text{g h}^{-1} \text{ mg}_{\text{cat}}^{-1}$                                                                | $21.5\%$ at $-0.2 \text{ V}$ vs RHE in $0.05 \text{ M H}_2\text{SO}_4$           | 198       |
| V <sub>O</sub> -Bi <sub>4</sub> O <sub>5</sub> I <sub>2</sub> -OH               | solvothermal approach                  | $20.44 \mu\text{g h} \text{ mg}_{\text{cat}}^{-1}$                                                                  | $32.4\%$ at $-0.1 \text{ V}$ vs RHE in $0.1 \text{ M Na}_2\text{SO}_4$           | 201       |
| Bi <sub>2</sub> S <sub>3-x</sub> /Ti <sub>3</sub> C <sub>2</sub> T <sub>x</sub> | Microwave-assisted solvothermal method | $68.3 \mu\text{g h}^{-1} \text{ mg}_{\text{cat}}^{-1}$ at $-0.6 \text{ V}$ vs RHE                                   | $22.5\%$ at $-0.4 \text{ V}$ vs RHE in $0.5 \text{ M LiClO}_4$                   | 206       |

|                                                        |                                |                                                                                                                           |                                                                             |     |
|--------------------------------------------------------|--------------------------------|---------------------------------------------------------------------------------------------------------------------------|-----------------------------------------------------------------------------|-----|
| Bi clusters in amorphous BiO <sub>x</sub>              | Electrochemical reconstruction | ~113 μg h <sup>-1</sup> mg <sub>cat</sub> <sup>-1</sup> at -0.8 V vs RHE in 0.5 M K <sub>2</sub> SO <sub>4</sub> (pH 2.5) | ~30 % at -0.6 V vs RHE in 0.5 M K <sub>2</sub> SO <sub>4</sub> (pH 2.5)     | 207 |
| Lithium/bismuth co-functionalized phosphotungstic acid | impregnation approach          | 61 ± 1 μg h <sup>-1</sup> mg <sub>cat</sub> <sup>-1</sup>                                                                 | 85% ± 2% at -0.1 V vs RHE in 0.1 M Li <sub>2</sub> SO <sub>4</sub> (pH = 4) | 214 |
